# Supplementary material
Source: publisher figshare collection journal article supplement (https://acs.figshare.com/ndownloader/files/4666216)
Supplement: Supplementary file 1 [file 4666216]

 
data_9c 
 
_audit_creation_method            SHELXL-97 
_chemical_name_systematic 
; 
 ? 
; 
_chemical_name_common             ? 
_chemical_melting_point           ? 
_chemical_formula_moiety          
 '(C8 H20 N 1+), (C12 H19 O3 S2 Si W 1-)'   
_chemical_formula_sum 
 'C20 H39 N O3 S2 Si W' 
_chemical_formula_weight          617.58 
 
loop_ 
 _atom_type_symbol 
 _atom_type_description 
 _atom_type_scat_dispersion_real 
 _atom_type_scat_dispersion_imag 
 _atom_type_scat_source 
 'C'  'C'   0.0033   0.0016 
 'International Tables Vol C Tables 4.2.6.8 and 6.1.1.4' 
 'H'  'H'   0.0000   0.0000 
 'International Tables Vol C Tables 4.2.6.8 and 6.1.1.4' 
 'N'  'N'   0.0061   0.0033 
 'International Tables Vol C Tables 4.2.6.8 and 6.1.1.4' 
 'O'  'O'   0.0106   0.0060 
 'International Tables Vol C Tables 4.2.6.8 and 6.1.1.4' 
 'Si'  'Si'   0.0817   0.0704 
 'International Tables Vol C Tables 4.2.6.8 and 6.1.1.4' 
 'S'  'S'   0.1246   0.1234 
 'International Tables Vol C Tables 4.2.6.8 and 6.1.1.4' 
 'W'  'W'  -0.8490   6.8722 
 'International Tables Vol C Tables 4.2.6.8 and 6.1.1.4' 
 
_symmetry_cell_setting            'Monoclinic'
_symmetry_space_group_name_Hall   '-P 2ybc'
_symmetry_space_group_name_H-M    'P 21/c'
_symmetry_Int_Tables_number       14  
 
loop_ 
 _symmetry_equiv_pos_as_xyz 
 'x, y, z' 
 '-x, y+1/2, -z+1/2' 
 '-x, -y, -z' 
 'x, -y-1/2, z-1/2' 
 
_cell_length_a                    19.940(4) 
_cell_length_b                    7.8300(16) 
_cell_length_c                    34.290(7) 
_cell_angle_alpha                 90.00 
_cell_angle_beta                  92.17(3) 
_cell_angle_gamma                 90.00 
_cell_volume                      5349.9(19) 
_cell_formula_units_Z             8 
_cell_measurement_temperature     193(2) 
_cell_measurement_reflns_used     ? 
_cell_measurement_theta_min       ? 
_cell_measurement_theta_max       ? 
 
_exptl_crystal_description        'block' 
_exptl_crystal_colour             'brown' 
_exptl_crystal_size_max           0.32 
_exptl_crystal_size_mid           0.20 
_exptl_crystal_size_min           0.18 
_exptl_crystal_density_meas       ? 
_exptl_crystal_density_diffrn     1.534 
_exptl_crystal_density_method     'not measured' 
_exptl_crystal_F_000              2480 
_exptl_absorpt_coefficient_mu     4.538 
_exptl_absorpt_correction_type    multi-scan 
_exptl_absorpt_correction_T_min   0.3246 
_exptl_absorpt_correction_T_max   0.4955 
_exptl_absorpt_process_details    'SADABS (Sheldrick, 2002)'   
 
_exptl_special_details 
; 
 ? 
; 
 
_diffrn_ambient_temperature       193(2) 
_diffrn_radiation_wavelength      0.71073 
_diffrn_radiation_type            MoK\a 
_diffrn_radiation_source          'normal-focus sealed tube' 
_diffrn_radiation_monochromator   graphite 
_diffrn_measurement_device_type    'Bruker Smart APEX CCD'  
_diffrn_measurement_method        '\w scans, 0.3\% rotations' 
_diffrn_detector_area_resol_mean  ? 
_diffrn_standards_number          ? 
_diffrn_standards_interval_count  ? 
_diffrn_standards_interval_time   ? 
_diffrn_standards_decay_%         0 
_diffrn_reflns_number             24527 
_diffrn_reflns_av_R_equivalents   0.0692 
_diffrn_reflns_av_sigmaI/netI     0.0683 
_diffrn_reflns_limit_h_min        -21 
_diffrn_reflns_limit_h_max        21 
_diffrn_reflns_limit_k_min        -8 
_diffrn_reflns_limit_k_max        8 
_diffrn_reflns_limit_l_min        -28 
_diffrn_reflns_limit_l_max        36 
_diffrn_reflns_theta_min          1.19 
_diffrn_reflns_theta_max          22.50 
_reflns_number_total              7001 
_reflns_number_gt                 4807 
_reflns_threshold_expression      'I>2\s(I)' 
 
_computing_data_collection        'SMART (Bruker, 2001)' 
_computing_cell_refinement        'SMART (Bruker, 2001)'
_computing_data_reduction         'SAINT (Bruker, 2003)'
_computing_structure_solution     'SHELXS-97 (Sheldrick, 1990)' 
_computing_structure_refinement   'SHELXL-97 (Sheldrick, 1997)' 
_computing_molecular_graphics     'SHELXTL (Bruker, 2000)'
_computing_publication_material   'SHELXTL (Bruker, 2000)'
 
_refine_special_details 
; 
 Refinement of F^2^ against ALL reflections.  The weighted R-factor wR and 
 goodness of fit S are based on F^2^, conventional R-factors R are based 
 on F, with F set to zero for negative F^2^. The threshold expression of 
 F^2^ > 2sigma(F^2^) is used only for calculating R-factors(gt) etc. and is 
 not relevant to the choice of reflections for refinement.  R-factors based 
 on F^2^ are statistically about twice as large as those based on F, and R- 
 factors based on ALL data will be even larger. 
; 
 
_refine_ls_structure_factor_coef  Fsqd  
_refine_ls_matrix_type            full 
_refine_ls_weighting_scheme       calc  
_refine_ls_weighting_details 
 'calc w=1/[\s^2^(Fo^2^)+(0.0729P)^2^+3.7578P] where P=(Fo^2^+2Fc^2^)/3' 
_atom_sites_solution_primary      direct 
_atom_sites_solution_secondary    difmap 
_atom_sites_solution_hydrogens    geom 
_refine_ls_hydrogen_treatment     constr 
_refine_ls_extinction_method      none 
_refine_ls_extinction_coef        ? 
_refine_ls_number_reflns          7001 
_refine_ls_number_parameters      523 
_refine_ls_number_restraints      0 
_refine_ls_R_factor_all           0.0918 
_refine_ls_R_factor_gt            0.0593 
_refine_ls_wR_factor_ref          0.1457 
_refine_ls_wR_factor_gt           0.1329 
_refine_ls_goodness_of_fit_ref    1.076 
_refine_ls_restrained_S_all       1.076 
_refine_ls_shift/su_max           0.001 
_refine_ls_shift/su_mean          0.000 
 
loop_ 
 _atom_site_label 
 _atom_site_type_symbol 
 _atom_site_fract_x 
 _atom_site_fract_y 
 _atom_site_fract_z 
 _atom_site_U_iso_or_equiv 
 _atom_site_adp_type 
 _atom_site_occupancy 
 _atom_site_symmetry_multiplicity 
 _atom_site_calc_flag 
 _atom_site_refinement_flags 
 _atom_site_disorder_assembly 
 _atom_site_disorder_group 
W1 W 0.73159(3) 0.68953(7) 0.676002(15) 0.03183(19) Uani 1 1 d . . . 
W2 W 0.70757(3) 0.68822(7) 0.916856(15) 0.0360(2) Uani 1 1 d . . . 
O1 O 0.6925(5) 0.7801(11) 0.6352(3) 0.041(2) Uani 1 1 d . . . 
O2 O 0.7465(5) 0.8508(11) 0.7099(3) 0.050(3) Uani 1 1 d . . . 
O4 O 0.7319(5) 0.6723(12) 0.8696(3) 0.049(3) Uani 1 1 d . . . 
O5 O 0.6984(5) 0.4839(11) 0.9348(3) 0.048(3) Uani 1 1 d . . . 
S1 S 0.63541(17) 0.6222(4) 0.71470(10) 0.0351(8) Uani 1 1 d . . . 
S2 S 0.73159(17) 0.3762(4) 0.67065(9) 0.0355(8) Uani 1 1 d . . . 
S3 S 0.58613(18) 0.6816(5) 0.90867(11) 0.0426(9) Uani 1 1 d . . . 
S4 S 0.68228(17) 0.9882(4) 0.93202(10) 0.0361(8) Uani 1 1 d . . . 
C1 C 0.6091(6) 0.4088(16) 0.7032(4) 0.032(3) Uani 1 1 d . . . 
C2 C 0.6515(6) 0.2995(16) 0.6838(4) 0.031(3) Uani 1 1 d . . . 
C3 C 0.6310(7) 0.1362(17) 0.6769(4) 0.040(4) Uani 1 1 d . . . 
H3 H 0.6599 0.0603 0.6639 0.048 Uiso 1 1 calc R . . 
C4 C 0.5698(7) 0.0780(18) 0.6881(4) 0.045(4) Uani 1 1 d . . . 
H4 H 0.5564 -0.0362 0.6827 0.054 Uiso 1 1 calc R . . 
C5 C 0.5285(7) 0.1860(18) 0.7072(4) 0.041(3) Uani 1 1 d . . . 
H5 H 0.4864 0.1459 0.7156 0.049 Uiso 1 1 calc R . . 
C6 C 0.5470(7) 0.3507(18) 0.7143(4) 0.044(4) Uani 1 1 d . . . 
H6 H 0.5174 0.4260 0.7269 0.053 Uiso 1 1 calc R . . 
C13 C 0.5592(7) 0.8894(16) 0.9016(3) 0.032(3) Uani 1 1 d . . . 
C14 C 0.6009(6) 1.0282(16) 0.9130(3) 0.031(3) Uani 1 1 d . . . 
C15 C 0.5761(7) 1.1968(19) 0.9097(4) 0.043(4) Uani 1 1 d . . . 
H15 H 0.6033 1.2892 0.9187 0.051 Uiso 1 1 calc R . . 
C16 C 0.5138(7) 1.2289(19) 0.8935(4) 0.047(4) Uani 1 1 d . . . 
H16 H 0.4981 1.3429 0.8905 0.056 Uiso 1 1 calc R . . 
C17 C 0.4732(7) 1.091(2) 0.8815(4) 0.048(4) Uani 1 1 d . . . 
H17 H 0.4296 1.1127 0.8706 0.058 Uiso 1 1 calc R . . 
C18 C 0.4949(6) 0.9254(19) 0.8850(4) 0.039(3) Uani 1 1 d . . . 
H18 H 0.4665 0.8346 0.8763 0.047 Uiso 1 1 calc R . . 
O3 O 0.8204(5) 0.6479(12) 0.6605(3) 0.054(3) Uani 1 1 d . . . 
O6 O 0.7870(4) 0.7573(11) 0.9459(3) 0.046(3) Uani 1 1 d . . . 
Si1 Si 0.9005(2) 0.6172(7) 0.65861(16) 0.0714(15) Uani 1 1 d . . . 
Si2 Si 0.8636(2) 0.8241(7) 0.95008(15) 0.0663(14) Uani 1 1 d . . . 
C7 C 0.9214(12) 0.391(2) 0.6687(12) 0.24(2) Uani 1 1 d . . . 
H7A H 0.8840 0.3180 0.6595 0.360 Uiso 1 1 calc R . . 
H7B H 0.9293 0.3746 0.6968 0.360 Uiso 1 1 calc R . . 
H7C H 0.9619 0.3594 0.6550 0.360 Uiso 1 1 calc R . . 
C8 C 0.9228(12) 0.680(5) 0.6069(7) 0.23(2) Uani 1 1 d . . . 
H8A H 0.9315 0.8035 0.6059 0.341 Uiso 1 1 calc R . . 
H8B H 0.8854 0.6518 0.5887 0.341 Uiso 1 1 calc R . . 
H8C H 0.9631 0.6182 0.5995 0.341 Uiso 1 1 calc R . . 
C9 C 0.9469(8) 0.763(3) 0.6926(7) 0.103(8) Uani 1 1 d . . . 
C10 C 0.9251(13) 0.943(3) 0.6827(12) 0.22(2) Uani 1 1 d . . . 
H10A H 0.9640 1.0195 0.6848 0.329 Uiso 1 1 calc R . . 
H10B H 0.8913 0.9802 0.7009 0.329 Uiso 1 1 calc R . . 
H10C H 0.9059 0.9463 0.6560 0.329 Uiso 1 1 calc R . . 
C11 C 0.9230(11) 0.718(3) 0.7340(7) 0.128(10) Uani 1 1 d . . . 
H11A H 0.8747 0.7390 0.7351 0.193 Uiso 1 1 calc R . . 
H11B H 0.9470 0.7885 0.7535 0.193 Uiso 1 1 calc R . . 
H11C H 0.9321 0.5968 0.7395 0.193 Uiso 1 1 calc R . . 
C12 C 1.0219(9) 0.731(3) 0.6897(8) 0.121(9) Uani 1 1 d . . . 
H12A H 1.0470 0.8169 0.7050 0.182 Uiso 1 1 calc R . . 
H12B H 1.0342 0.7380 0.6623 0.182 Uiso 1 1 calc R . . 
H12C H 1.0329 0.6168 0.6999 0.182 Uiso 1 1 calc R . . 
C19 C 0.8768(11) 1.007(3) 0.9154(7) 0.137(10) Uani 1 1 d . . . 
H19A H 0.8379 1.0837 0.9155 0.205 Uiso 1 1 calc R . . 
H19B H 0.8822 0.9627 0.8890 0.205 Uiso 1 1 calc R . . 
H19C H 0.9173 1.0707 0.9238 0.205 Uiso 1 1 calc R . . 
C20 C 0.8779(10) 0.895(3) 1.0008(6) 0.132(10) Uani 1 1 d . . . 
H20A H 0.8673 0.8020 1.0186 0.199 Uiso 1 1 calc R . . 
H20B H 0.8490 0.9935 1.0058 0.199 Uiso 1 1 calc R . . 
H20C H 0.9250 0.9283 1.0050 0.199 Uiso 1 1 calc R . . 
C21 C 0.9169(12) 0.638(3) 0.9378(7) 0.102(7) Uani 1 1 d . . . 
C22 C 0.9016(13) 0.493(3) 0.9678(9) 0.186(16) Uani 1 1 d . . . 
H22A H 0.8557 0.4508 0.9629 0.280 Uiso 1 1 calc R . . 
H22B H 0.9061 0.5382 0.9944 0.280 Uiso 1 1 calc R . . 
H22C H 0.9334 0.3986 0.9648 0.280 Uiso 1 1 calc R . . 
C23 C 0.9076(12) 0.591(4) 0.8959(8) 0.187(16) Uani 1 1 d . . . 
H23A H 0.8610 0.5567 0.8905 0.281 Uiso 1 1 calc R . . 
H23B H 0.9376 0.4960 0.8900 0.281 Uiso 1 1 calc R . . 
H23C H 0.9183 0.6896 0.8797 0.281 Uiso 1 1 calc R . . 
C24 C 0.9939(9) 0.694(4) 0.9458(8) 0.153(12) Uani 1 1 d . . . 
H24A H 1.0017 0.8048 0.9335 0.229 Uiso 1 1 calc R . . 
H24B H 1.0236 0.6082 0.9347 0.229 Uiso 1 1 calc R . . 
H24C H 1.0034 0.7025 0.9740 0.229 Uiso 1 1 calc R . . 
N1 N 0.7175(5) 0.1845(13) 0.8035(3) 0.032(3) Uani 1 1 d . . . 
N2 N 0.6635(6) 0.1618(15) 0.5428(3) 0.048(3) Uani 1 1 d . . . 
C31 C 0.6704(7) 0.0669(17) 0.7804(4) 0.040(3) Uani 1 1 d . . . 
H31A H 0.6965 0.0064 0.7606 0.048 Uiso 1 1 calc R . . 
H31B H 0.6364 0.1378 0.7661 0.048 Uiso 1 1 calc R . . 
C32 C 0.6340(7) -0.0656(19) 0.8044(4) 0.054(4) Uani 1 1 d . . . 
H32A H 0.6060 -0.0075 0.8232 0.080 Uiso 1 1 calc R . . 
H32B H 0.6670 -0.1379 0.8184 0.080 Uiso 1 1 calc R . . 
H32C H 0.6055 -0.1365 0.7870 0.080 Uiso 1 1 calc R . . 
C33 C 0.7705(6) 0.0796(19) 0.8255(4) 0.042(4) Uani 1 1 d . . . 
H33A H 0.8010 0.1591 0.8399 0.050 Uiso 1 1 calc R . . 
H33B H 0.7479 0.0091 0.8451 0.050 Uiso 1 1 calc R . . 
C34 C 0.8127(7) -0.037(2) 0.8011(4) 0.061(5) Uani 1 1 d . . . 
H34A H 0.8367 0.0305 0.7821 0.091 Uiso 1 1 calc R . . 
H34B H 0.7834 -0.1200 0.7873 0.091 Uiso 1 1 calc R . . 
H34C H 0.8451 -0.0986 0.8181 0.091 Uiso 1 1 calc R . . 
C35 C 0.7483(7) 0.2996(18) 0.7740(4) 0.045(4) Uani 1 1 d . . . 
H35A H 0.7118 0.3586 0.7590 0.054 Uiso 1 1 calc R . . 
H35B H 0.7730 0.2284 0.7555 0.054 Uiso 1 1 calc R . . 
C36 C 0.7962(8) 0.434(2) 0.7914(5) 0.073(5) Uani 1 1 d . . . 
H36A H 0.8300 0.3781 0.8086 0.110 Uiso 1 1 calc R . . 
H36B H 0.7709 0.5164 0.8065 0.110 Uiso 1 1 calc R . . 
H36C H 0.8185 0.4933 0.7703 0.110 Uiso 1 1 calc R . . 
C37 C 0.6801(7) 0.2822(17) 0.8338(4) 0.039(3) Uani 1 1 d . . . 
H37A H 0.7124 0.3560 0.8486 0.047 Uiso 1 1 calc R . . 
H37B H 0.6616 0.1997 0.8524 0.047 Uiso 1 1 calc R . . 
C38 C 0.6234(7) 0.3924(18) 0.8173(4) 0.047(4) Uani 1 1 d . . . 
H38A H 0.5884 0.3194 0.8054 0.071 Uiso 1 1 calc R . . 
H38B H 0.6406 0.4697 0.7976 0.071 Uiso 1 1 calc R . . 
H38C H 0.6045 0.4594 0.8384 0.071 Uiso 1 1 calc R . . 
C41 C 0.7311(8) 0.107(3) 0.5299(5) 0.082(6) Uani 1 1 d . . . 
H41A H 0.7538 0.2066 0.5183 0.098 Uiso 1 1 calc R . . 
H41B H 0.7253 0.0191 0.5094 0.098 Uiso 1 1 calc R . . 
C42 C 0.7769(9) 0.034(4) 0.5645(6) 0.128(10) Uani 1 1 d . . . 
H42A H 0.7504 -0.0436 0.5803 0.192 Uiso 1 1 calc R . . 
H42B H 0.7940 0.1281 0.5808 0.192 Uiso 1 1 calc R . . 
H42C H 0.8146 -0.0288 0.5538 0.192 Uiso 1 1 calc R . . 
C43 C 0.6256(10) 0.024(2) 0.5623(5) 0.073(5) Uani 1 1 d . . . 
H43A H 0.5814 0.0694 0.5697 0.088 Uiso 1 1 calc R . . 
H43B H 0.6505 -0.0107 0.5865 0.088 Uiso 1 1 calc R . . 
C44 C 0.6143(13) -0.136(3) 0.5354(6) 0.125(9) Uani 1 1 d . . . 
H44A H 0.6568 -0.1675 0.5238 0.188 Uiso 1 1 calc R . . 
H44B H 0.5810 -0.1090 0.5145 0.188 Uiso 1 1 calc R . . 
H44C H 0.5982 -0.2316 0.5509 0.188 Uiso 1 1 calc R . . 
C45 C 0.6250(9) 0.224(2) 0.5072(4) 0.070(5) Uani 1 1 d . . . 
H45A H 0.6527 0.3095 0.4940 0.084 Uiso 1 1 calc R . . 
H45B H 0.6182 0.1264 0.4891 0.084 Uiso 1 1 calc R . . 
C46 C 0.5579(10) 0.302(3) 0.5141(5) 0.096(7) Uani 1 1 d . . . 
H46A H 0.5641 0.4086 0.5288 0.145 Uiso 1 1 calc R . . 
H46B H 0.5310 0.2225 0.5291 0.145 Uiso 1 1 calc R . . 
H46C H 0.5347 0.3263 0.4890 0.145 Uiso 1 1 calc R . . 
C47 C 0.6691(11) 0.300(3) 0.5729(5) 0.089(6) Uani 1 1 d . . . 
H47A H 0.6893 0.2514 0.5973 0.107 Uiso 1 1 calc R . . 
H47B H 0.6235 0.3404 0.5785 0.107 Uiso 1 1 calc R . . 
C48 C 0.7117(13) 0.454(3) 0.5604(6) 0.125(9) Uani 1 1 d . . . 
H48A H 0.6911 0.5061 0.5369 0.188 Uiso 1 1 calc R . . 
H48B H 0.7572 0.4155 0.5550 0.188 Uiso 1 1 calc R . . 
H48C H 0.7139 0.5386 0.5815 0.188 Uiso 1 1 calc R . . 
 
loop_ 
 _atom_site_aniso_label 
 _atom_site_aniso_U_11 
 _atom_site_aniso_U_22 
 _atom_site_aniso_U_33 
 _atom_site_aniso_U_23 
 _atom_site_aniso_U_13 
 _atom_site_aniso_U_12 
W1 0.0320(3) 0.0323(3) 0.0310(3) -0.0030(3) -0.0018(2) 0.0027(3) 
W2 0.0416(4) 0.0342(4) 0.0318(4) 0.0023(3) -0.0016(3) -0.0018(3) 
O1 0.051(6) 0.039(6) 0.034(5) 0.002(4) 0.005(5) -0.001(5) 
O2 0.043(6) 0.039(6) 0.068(7) -0.012(5) 0.002(5) 0.005(5) 
O4 0.056(6) 0.052(6) 0.041(6) -0.005(5) 0.007(5) 0.009(5) 
O5 0.058(6) 0.023(5) 0.064(7) 0.035(5) -0.001(5) -0.014(5) 
S1 0.040(2) 0.0291(18) 0.036(2) -0.0044(15) 0.0062(16) 0.0067(15) 
S2 0.040(2) 0.037(2) 0.030(2) 0.0003(15) 0.0063(16) 0.0095(16) 
S3 0.044(2) 0.036(2) 0.049(2) -0.0024(18) 0.0028(17) -0.0061(18) 
S4 0.042(2) 0.0284(19) 0.038(2) -0.0175(15) 0.0000(16) 0.0015(16) 
C1 0.038(8) 0.027(8) 0.030(8) -0.006(6) 0.001(6) -0.011(7) 
C2 0.040(8) 0.021(7) 0.033(8) 0.024(6) 0.001(6) -0.005(6) 
C3 0.055(10) 0.035(9) 0.029(8) 0.006(6) 0.000(7) 0.015(7) 
C4 0.050(10) 0.029(8) 0.056(10) -0.001(7) -0.011(8) -0.002(8) 
C5 0.036(8) 0.037(8) 0.050(9) 0.002(8) -0.003(7) -0.001(7) 
C6 0.045(9) 0.042(10) 0.047(9) 0.004(7) -0.005(7) 0.009(7) 
C13 0.053(9) 0.030(7) 0.013(7) -0.006(6) 0.008(6) -0.020(7) 
C14 0.038(8) 0.035(8) 0.019(7) -0.011(6) -0.001(6) -0.001(6) 
C15 0.051(9) 0.046(9) 0.031(8) 0.000(7) 0.003(7) 0.000(8) 
C16 0.052(10) 0.046(10) 0.041(9) 0.004(7) 0.004(8) 0.019(8) 
C17 0.043(9) 0.074(12) 0.027(8) 0.003(8) 0.002(7) 0.008(9) 
C18 0.032(8) 0.047(10) 0.038(8) -0.012(7) -0.004(6) -0.003(7) 
O3 0.040(6) 0.047(6) 0.077(8) -0.009(5) 0.015(5) 0.000(5) 
O6 0.030(5) 0.052(6) 0.053(6) -0.009(5) -0.024(5) -0.012(4) 
Si1 0.045(3) 0.086(4) 0.084(4) -0.017(3) 0.006(3) 0.011(3) 
Si2 0.057(3) 0.082(4) 0.059(3) -0.002(3) -0.014(2) -0.004(3) 
C7 0.088(18) 0.019(11) 0.61(7) -0.02(2) 0.03(3) 0.028(12) 
C8 0.067(16) 0.55(7) 0.069(17) -0.02(3) 0.012(13) 0.01(3) 
C9 0.031(10) 0.18(3) 0.097(17) -0.008(16) 0.007(10) -0.008(12) 
C10 0.11(2) 0.059(16) 0.49(7) 0.03(3) 0.02(3) 0.011(16) 
C11 0.079(15) 0.21(3) 0.101(19) -0.035(19) 0.017(14) -0.037(17) 
C12 0.046(12) 0.14(2) 0.17(3) -0.037(18) 0.003(14) -0.012(13) 
C19 0.104(18) 0.15(2) 0.16(2) 0.064(19) -0.017(17) -0.061(17) 
C20 0.099(17) 0.20(3) 0.096(18) -0.081(18) -0.039(14) 0.005(18) 
C21 0.115(19) 0.085(16) 0.104(18) -0.019(14) -0.029(15) 0.019(13) 
C22 0.15(2) 0.13(2) 0.28(4) 0.13(3) -0.02(3) 0.035(19) 
C23 0.11(2) 0.28(4) 0.17(3) -0.14(3) -0.02(2) 0.05(2) 
C24 0.043(13) 0.25(4) 0.16(3) 0.00(2) -0.003(15) 0.043(17) 
N1 0.032(6) 0.039(6) 0.024(6) 0.004(5) -0.001(5) 0.004(6) 
N2 0.072(9) 0.049(8) 0.022(6) 0.005(6) 0.002(6) -0.001(7) 
C31 0.044(8) 0.041(9) 0.033(8) -0.008(7) -0.010(7) 0.004(7) 
C32 0.050(9) 0.050(10) 0.061(11) -0.014(8) 0.004(8) -0.012(8) 
C33 0.039(8) 0.059(10) 0.027(8) -0.001(7) -0.017(6) 0.013(7) 
C34 0.050(10) 0.067(11) 0.064(11) 0.005(9) -0.005(8) 0.025(9) 
C35 0.051(9) 0.046(9) 0.039(9) 0.005(7) 0.013(7) 0.011(8) 
C36 0.053(10) 0.082(14) 0.086(13) 0.022(11) 0.017(10) -0.013(10) 
C37 0.046(8) 0.045(9) 0.027(8) -0.010(7) 0.000(7) -0.007(7) 
C38 0.062(10) 0.038(8) 0.044(9) -0.002(7) 0.010(8) 0.014(8) 
C41 0.042(10) 0.142(19) 0.062(12) -0.020(12) 0.014(9) 0.003(11) 
C42 0.072(14) 0.23(3) 0.081(16) 0.013(18) -0.011(12) 0.046(17) 
C43 0.105(15) 0.070(12) 0.046(11) 0.007(9) 0.020(10) -0.015(11) 
C44 0.20(3) 0.078(16) 0.103(18) 0.001(13) 0.051(18) -0.058(17) 
C45 0.078(12) 0.101(14) 0.032(9) 0.029(9) 0.005(9) 0.028(11) 
C46 0.104(16) 0.145(19) 0.041(11) 0.017(12) 0.007(10) 0.071(15) 
C47 0.128(18) 0.091(15) 0.049(12) 0.013(11) 0.013(11) -0.010(14) 
C48 0.21(3) 0.095(17) 0.070(15) -0.020(13) 0.001(16) -0.040(19) 
 
_geom_special_details 
; 
 All esds (except the esd in the dihedral angle between two l.s. planes) 
 are estimated using the full covariance matrix.  The cell esds are taken 
 into account individually in the estimation of esds in distances, angles 
 and torsion angles; correlations between esds in cell parameters are only 
 used when they are defined by crystal symmetry.  An approximate (isotropic) 
 treatment of cell esds is used for estimating esds involving l.s. planes. 
; 
 
loop_ 
 _geom_bond_atom_site_label_1 
 _geom_bond_atom_site_label_2 
 _geom_bond_distance 
 _geom_bond_site_symmetry_2 
 _geom_bond_publ_flag 
W1 O1 1.727(9) . ? 
W1 O2 1.733(9) . ? 
W1 O3 1.896(9) . ? 
W1 S1 2.431(4) . ? 
W1 S2 2.460(4) . ? 
W2 O4 1.713(9) . ? 
W2 O5 1.726(8) . ? 
W2 O6 1.916(8) . ? 
W2 S3 2.428(4) . ? 
W2 S4 2.462(3) . ? 
S1 C1 1.791(12) . ? 
S2 C2 1.779(13) . ? 
S3 C13 1.727(14) . ? 
S4 C14 1.754(13) . ? 
C1 C6 1.385(18) . ? 
C1 C2 1.392(18) . ? 
C2 C3 1.360(18) . ? 
C3 C4 1.370(19) . ? 
C4 C5 1.366(19) . ? 
C5 C6 1.361(18) . ? 
C13 C18 1.411(17) . ? 
C13 C14 1.415(16) . ? 
C14 C15 1.412(18) . ? 
C15 C16 1.365(19) . ? 
C16 C17 1.40(2) . ? 
C17 C18 1.37(2) . ? 
O3 Si1 1.618(10) . ? 
O6 Si2 1.616(9) . ? 
Si1 C7 1.85(2) . ? 
Si1 C9 1.85(2) . ? 
Si1 C8 1.91(3) . ? 
Si2 C20 1.837(19) . ? 
Si2 C21 1.86(2) . ? 
Si2 C19 1.89(2) . ? 
C9 C10 1.51(3) . ? 
C9 C12 1.52(2) . ? 
C9 C11 1.56(3) . ? 
C21 C23 1.49(3) . ? 
C21 C22 1.57(3) . ? 
C21 C24 1.61(3) . ? 
N1 C35 1.502(16) . ? 
N1 C37 1.510(16) . ? 
N1 C31 1.516(15) . ? 
N1 C33 1.518(15) . ? 
N2 C43 1.489(18) . ? 
N2 C47 1.49(2) . ? 
N2 C41 1.496(19) . ? 
N2 C45 1.500(17) . ? 
C31 C32 1.526(19) . ? 
C33 C34 1.517(18) . ? 
C35 C36 1.53(2) . ? 
C37 C38 1.514(18) . ? 
C41 C42 1.58(2) . ? 
C43 C44 1.57(2) . ? 
C45 C46 1.50(2) . ? 
C47 C48 1.55(3) . ? 
 
loop_ 
 _geom_angle_atom_site_label_1 
 _geom_angle_atom_site_label_2 
 _geom_angle_atom_site_label_3 
 _geom_angle 
 _geom_angle_site_symmetry_1 
 _geom_angle_site_symmetry_3 
 _geom_angle_publ_flag 
O1 W1 O2 107.7(4) . . ? 
O1 W1 O3 104.0(4) . . ? 
O2 W1 O3 100.1(4) . . ? 
O1 W1 S1 101.0(3) . . ? 
O2 W1 S1 84.9(3) . . ? 
O3 W1 S1 151.6(3) . . ? 
O1 W1 S2 110.5(3) . . ? 
O2 W1 S2 140.9(3) . . ? 
O3 W1 S2 78.8(3) . . ? 
S1 W1 S2 80.01(11) . . ? 
O4 W2 O5 107.9(5) . . ? 
O4 W2 O6 104.6(4) . . ? 
O5 W2 O6 100.0(4) . . ? 
O4 W2 S3 101.9(3) . . ? 
O5 W2 S3 84.4(3) . . ? 
O6 W2 S3 150.2(3) . . ? 
O4 W2 S4 109.7(3) . . ? 
O5 W2 S4 141.6(4) . . ? 
O6 W2 S4 78.0(3) . . ? 
S3 W2 S4 80.41(12) . . ? 
C1 S1 W1 108.2(4) . . ? 
C2 S2 W1 108.4(4) . . ? 
C13 S3 W2 107.5(5) . . ? 
C14 S4 W2 106.6(4) . . ? 
C6 C1 C2 119.7(12) . . ? 
C6 C1 S1 120.2(10) . . ? 
C2 C1 S1 120.0(10) . . ? 
C3 C2 C1 118.4(12) . . ? 
C3 C2 S2 122.8(11) . . ? 
C1 C2 S2 118.8(10) . . ? 
C2 C3 C4 122.0(13) . . ? 
C5 C4 C3 119.3(13) . . ? 
C6 C5 C4 120.5(13) . . ? 
C5 C6 C1 120.1(13) . . ? 
C18 C13 C14 118.2(12) . . ? 
C18 C13 S3 121.2(10) . . ? 
C14 C13 S3 120.5(10) . . ? 
C15 C14 C13 119.7(12) . . ? 
C15 C14 S4 120.8(10) . . ? 
C13 C14 S4 119.4(10) . . ? 
C16 C15 C14 121.0(14) . . ? 
C15 C16 C17 118.9(14) . . ? 
C18 C17 C16 121.9(13) . . ? 
C17 C18 C13 120.2(13) . . ? 
Si1 O3 W1 165.9(7) . . ? 
Si2 O6 W2 153.9(7) . . ? 
O3 Si1 C7 110.5(9) . . ? 
O3 Si1 C9 110.7(8) . . ? 
C7 Si1 C9 111.6(13) . . ? 
O3 Si1 C8 105.3(9) . . ? 
C7 Si1 C8 111.3(17) . . ? 
C9 Si1 C8 107.2(13) . . ? 
O6 Si2 C20 107.2(9) . . ? 
O6 Si2 C21 105.7(9) . . ? 
C20 Si2 C21 112.5(10) . . ? 
O6 Si2 C19 110.1(8) . . ? 
C20 Si2 C19 110.2(12) . . ? 
C21 Si2 C19 111.0(12) . . ? 
C10 C9 C12 114(2) . . ? 
C10 C9 C11 109(2) . . ? 
C12 C9 C11 111.0(19) . . ? 
C10 C9 Si1 107.5(18) . . ? 
C12 C9 Si1 109.0(16) . . ? 
C11 C9 Si1 105.7(15) . . ? 
C23 C21 C22 116(2) . . ? 
C23 C21 C24 108(2) . . ? 
C22 C21 C24 107.0(19) . . ? 
C23 C21 Si2 111.2(17) . . ? 
C22 C21 Si2 107.0(18) . . ? 
C24 C21 Si2 107.2(15) . . ? 
C35 N1 C37 112.6(10) . . ? 
C35 N1 C31 105.9(10) . . ? 
C37 N1 C31 110.8(10) . . ? 
C35 N1 C33 111.4(10) . . ? 
C37 N1 C33 106.5(9) . . ? 
C31 N1 C33 109.7(10) . . ? 
C43 N2 C47 103.9(12) . . ? 
C43 N2 C41 114.0(14) . . ? 
C47 N2 C41 111.5(14) . . ? 
C43 N2 C45 110.2(13) . . ? 
C47 N2 C45 110.5(13) . . ? 
C41 N2 C45 106.9(12) . . ? 
N1 C31 C32 115.4(10) . . ? 
C34 C33 N1 116.2(10) . . ? 
N1 C35 C36 114.6(12) . . ? 
N1 C37 C38 114.4(10) . . ? 
N2 C41 C42 112.5(14) . . ? 
N2 C43 C44 112.2(13) . . ? 
C46 C45 N2 115.9(13) . . ? 
N2 C47 C48 113.7(15) . . ? 
 
loop_ 
 _geom_torsion_atom_site_label_1 
 _geom_torsion_atom_site_label_2 
 _geom_torsion_atom_site_label_3 
 _geom_torsion_atom_site_label_4 
 _geom_torsion 
 _geom_torsion_site_symmetry_1 
 _geom_torsion_site_symmetry_2 
 _geom_torsion_site_symmetry_3 
 _geom_torsion_site_symmetry_4 
 _geom_torsion_publ_flag 
O1 W1 S1 C1 91.6(5) . . . . ? 
O2 W1 S1 C1 -161.4(5) . . . . ? 
O3 W1 S1 C1 -59.6(8) . . . . ? 
S2 W1 S1 C1 -17.6(5) . . . . ? 
O1 W1 S2 C2 -80.4(5) . . . . ? 
O2 W1 S2 C2 86.6(7) . . . . ? 
O3 W1 S2 C2 178.8(5) . . . . ? 
S1 W1 S2 C2 17.7(4) . . . . ? 
O4 W2 S3 C13 -88.2(5) . . . . ? 
O5 W2 S3 C13 164.6(5) . . . . ? 
O6 W2 S3 C13 64.3(7) . . . . ? 
S4 W2 S3 C13 20.0(4) . . . . ? 
O4 W2 S4 C14 80.9(6) . . . . ? 
O5 W2 S4 C14 -86.6(7) . . . . ? 
O6 W2 S4 C14 -177.6(5) . . . . ? 
S3 W2 S4 C14 -18.4(4) . . . . ? 
W1 S1 C1 C6 -165.7(9) . . . . ? 
W1 S1 C1 C2 15.7(11) . . . . ? 
C6 C1 C2 C3 -1.2(18) . . . . ? 
S1 C1 C2 C3 177.4(9) . . . . ? 
C6 C1 C2 S2 -178.8(9) . . . . ? 
S1 C1 C2 S2 -0.2(14) . . . . ? 
W1 S2 C2 C3 167.3(9) . . . . ? 
W1 S2 C2 C1 -15.2(11) . . . . ? 
C1 C2 C3 C4 0.7(19) . . . . ? 
S2 C2 C3 C4 178.2(10) . . . . ? 
C2 C3 C4 C5 -1(2) . . . . ? 
C3 C4 C5 C6 1(2) . . . . ? 
C4 C5 C6 C1 -2(2) . . . . ? 
C2 C1 C6 C5 2(2) . . . . ? 
S1 C1 C6 C5 -176.8(10) . . . . ? 
W2 S3 C13 C18 161.6(9) . . . . ? 
W2 S3 C13 C14 -19.7(11) . . . . ? 
C18 C13 C14 C15 3.4(18) . . . . ? 
S3 C13 C14 C15 -175.4(10) . . . . ? 
C18 C13 C14 S4 -177.6(9) . . . . ? 
S3 C13 C14 S4 3.7(15) . . . . ? 
W2 S4 C14 C15 -166.9(9) . . . . ? 
W2 S4 C14 C13 14.1(11) . . . . ? 
C13 C14 C15 C16 -4(2) . . . . ? 
S4 C14 C15 C16 177.5(11) . . . . ? 
C14 C15 C16 C17 2(2) . . . . ? 
C15 C16 C17 C18 -1(2) . . . . ? 
C16 C17 C18 C13 1(2) . . . . ? 
C14 C13 C18 C17 -2.1(19) . . . . ? 
S3 C13 C18 C17 176.6(11) . . . . ? 
O1 W1 O3 Si1 153(3) . . . . ? 
O2 W1 O3 Si1 42(3) . . . . ? 
S1 W1 O3 Si1 -56(3) . . . . ? 
S2 W1 O3 Si1 -99(3) . . . . ? 
O4 W2 O6 Si2 9.6(15) . . . . ? 
O5 W2 O6 Si2 121.2(14) . . . . ? 
S3 W2 O6 Si2 -142.5(11) . . . . ? 
S4 W2 O6 Si2 -97.8(14) . . . . ? 
W1 O3 Si1 C7 85(3) . . . . ? 
W1 O3 Si1 C9 -40(3) . . . . ? 
W1 O3 Si1 C8 -155(3) . . . . ? 
W2 O6 Si2 C20 165.6(15) . . . . ? 
W2 O6 Si2 C21 -74.2(16) . . . . ? 
W2 O6 Si2 C19 45.8(18) . . . . ? 
O3 Si1 C9 C10 -55.0(19) . . . . ? 
C7 Si1 C9 C10 -179(2) . . . . ? 
C8 Si1 C9 C10 59(2) . . . . ? 
O3 Si1 C9 C12 -179.6(15) . . . . ? 
C7 Si1 C9 C12 57(2) . . . . ? 
C8 Si1 C9 C12 -65(2) . . . . ? 
O3 Si1 C9 C11 61.0(18) . . . . ? 
C7 Si1 C9 C11 -62.5(19) . . . . ? 
C8 Si1 C9 C11 175.4(17) . . . . ? 
O6 Si2 C21 C23 67(2) . . . . ? 
C20 Si2 C21 C23 -176(2) . . . . ? 
C19 Si2 C21 C23 -52(2) . . . . ? 
O6 Si2 C21 C22 -59.9(17) . . . . ? 
C20 Si2 C21 C22 56.7(19) . . . . ? 
C19 Si2 C21 C22 -179.3(16) . . . . ? 
O6 Si2 C21 C24 -174.5(15) . . . . ? 
C20 Si2 C21 C24 -58(2) . . . . ? 
C19 Si2 C21 C24 66.1(18) . . . . ? 
C35 N1 C31 C32 178.8(12) . . . . ? 
C37 N1 C31 C32 -58.9(14) . . . . ? 
C33 N1 C31 C32 58.4(14) . . . . ? 
C35 N1 C33 C34 -59.9(16) . . . . ? 
C37 N1 C33 C34 177.0(13) . . . . ? 
C31 N1 C33 C34 57.0(16) . . . . ? 
C37 N1 C35 C36 56.8(15) . . . . ? 
C31 N1 C35 C36 178.0(12) . . . . ? 
C33 N1 C35 C36 -62.7(15) . . . . ? 
C35 N1 C37 C38 59.1(14) . . . . ? 
C31 N1 C37 C38 -59.3(14) . . . . ? 
C33 N1 C37 C38 -178.6(11) . . . . ? 
C43 N2 C41 C42 -56(2) . . . . ? 
C47 N2 C41 C42 61(2) . . . . ? 
C45 N2 C41 C42 -178.4(17) . . . . ? 
C47 N2 C43 C44 -179.7(18) . . . . ? 
C41 N2 C43 C44 -58(2) . . . . ? 
C45 N2 C43 C44 62(2) . . . . ? 
C43 N2 C45 C46 62(2) . . . . ? 
C47 N2 C45 C46 -52(2) . . . . ? 
C41 N2 C45 C46 -173.9(18) . . . . ? 
C43 N2 C47 C48 175.8(17) . . . . ? 
C41 N2 C47 C48 53(2) . . . . ? 
C45 N2 C47 C48 -66(2) . . . . ? 
 
_diffrn_measured_fraction_theta_max    1.000 
_diffrn_reflns_theta_full              22.50 
_diffrn_measured_fraction_theta_full   1.000 
_refine_diff_density_max    4.907 
_refine_diff_density_min   -1.671 
_refine_diff_density_rms    0.168 
